# Supplementary material
Source: PubMed Central journal article supplement (PMC2277020)
Supplement: tjp0583-0581-SD1.pdf [file tjp0583-0581-SD1.pdf]

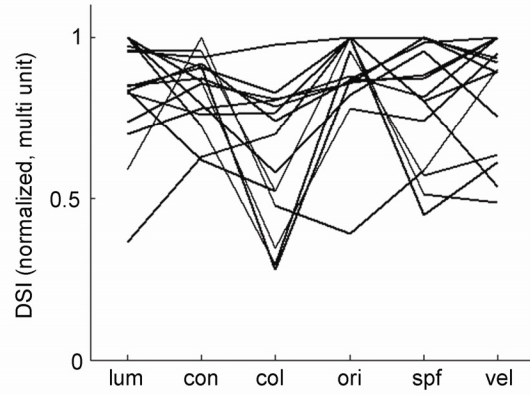

**Supplementary Figure 1.** Discontinuity sensitivity index of the 15 multi-unit recordings with strong surround suppression ( $SI > 0.5$ ). The DSIs (lum: luminance; con: contrast; cor: colour; ori: orientation; spf: special frequency; vel: velocity) are normalized by the highest DSI of each cell. Each line represents data from one recording.
